# Supplementary material
Source: ML conference proceedings conference paper supplement (https://aclanthology.org/2026.semeval-1.119)

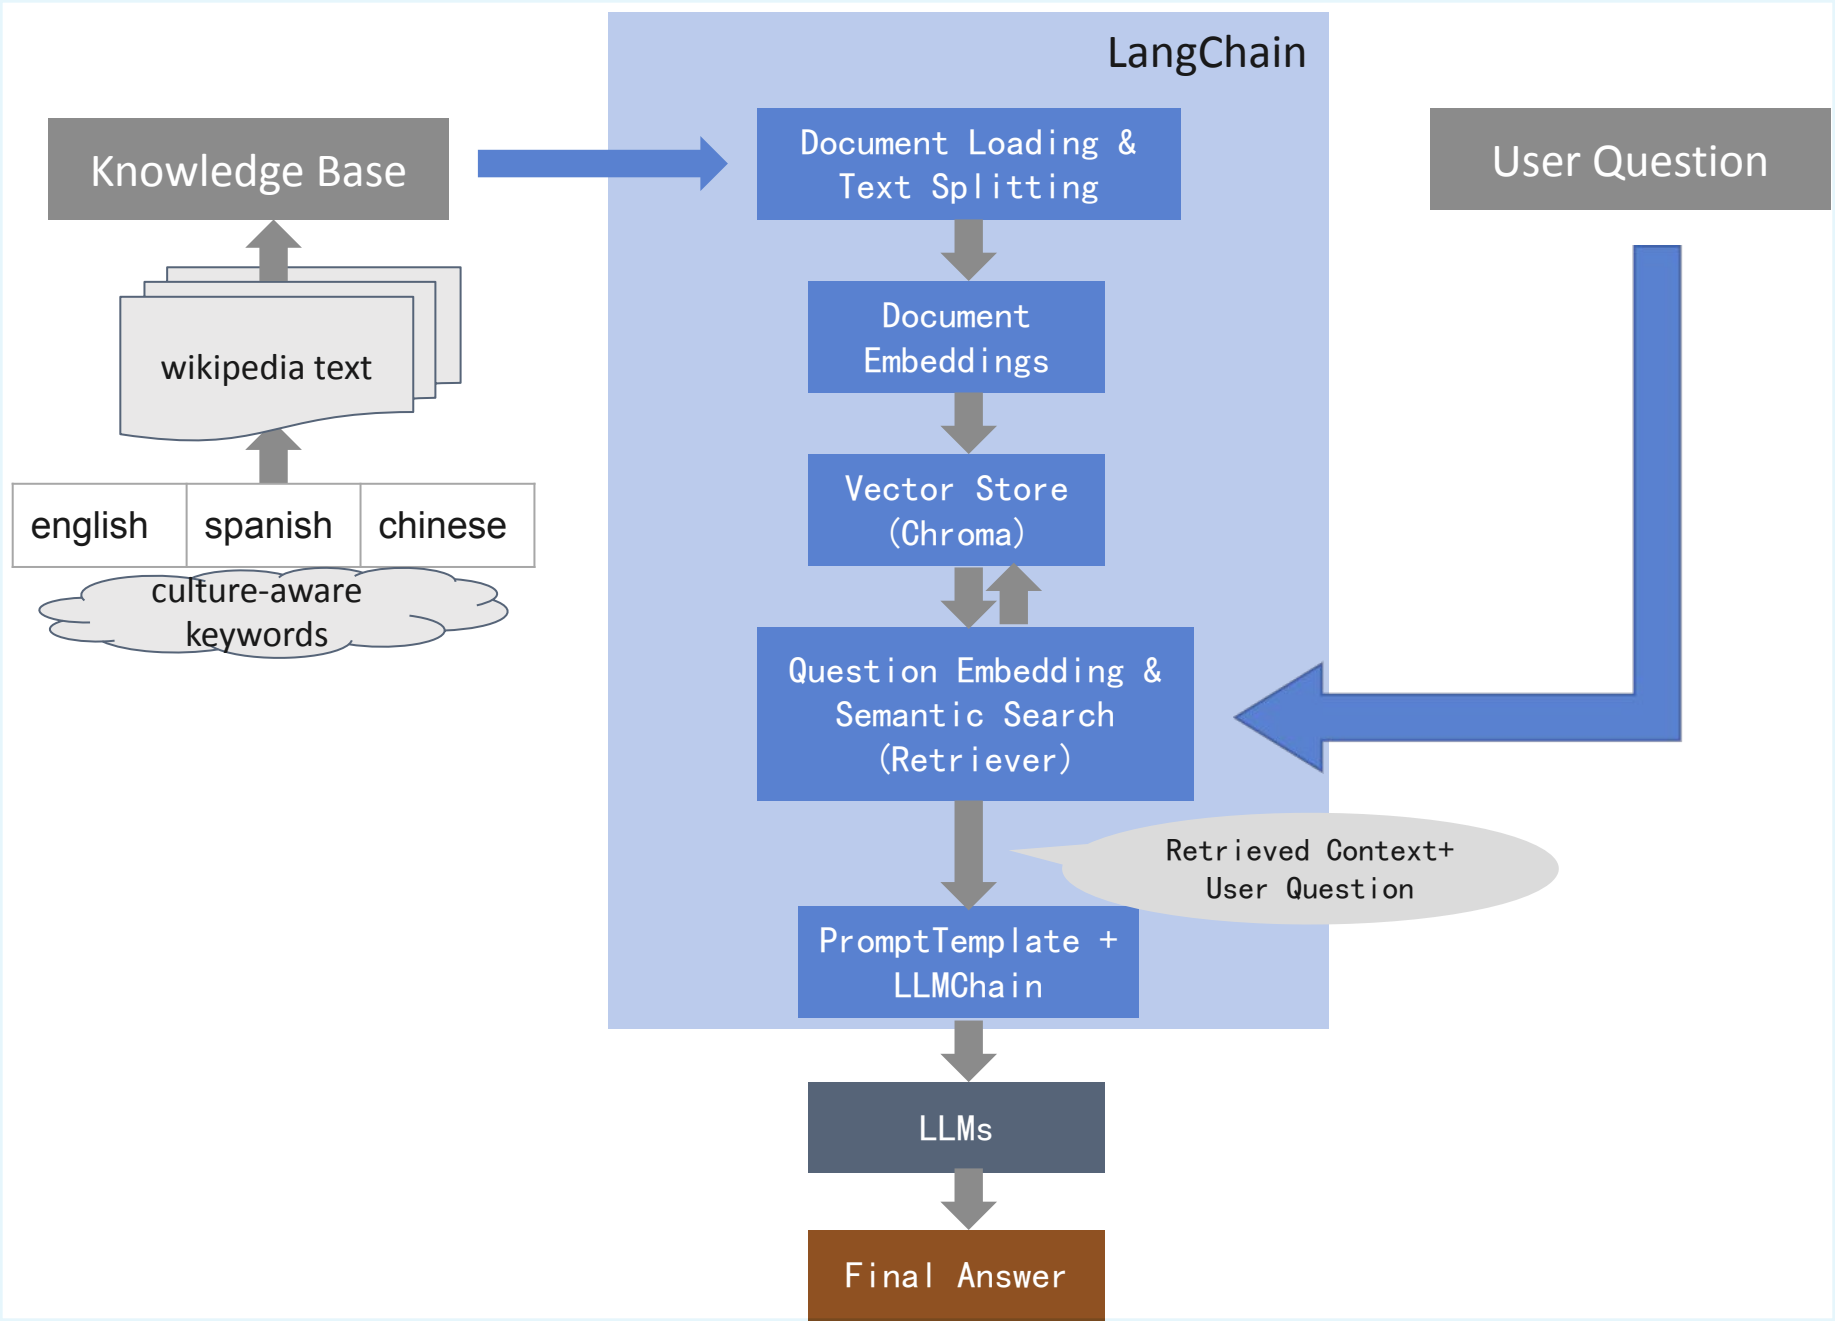

Supplement: SupplementaryMaterial [file LangChain.pptx_cropped.pdf › latex/figs/LangChain.pptx_cropped.pdf]

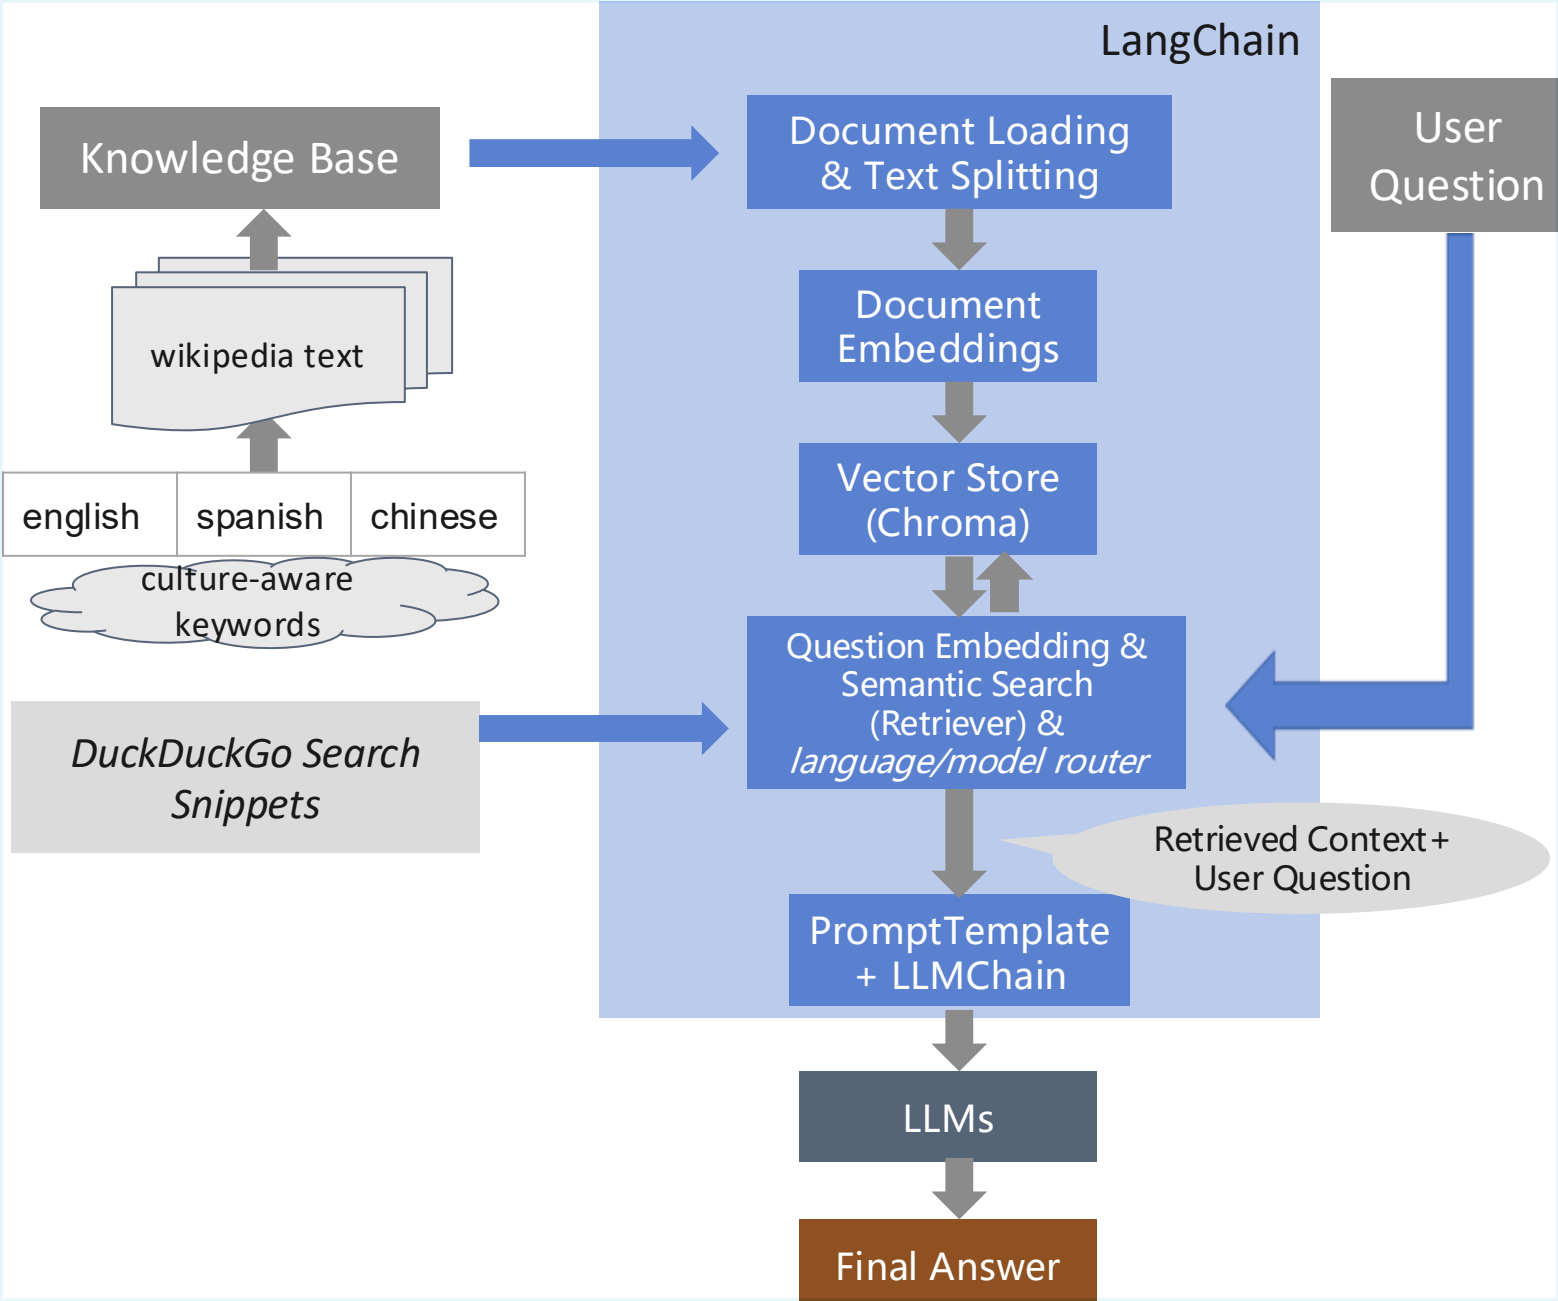

Supplement: SupplementaryMaterial [file LangChain_cropped-2.pdf › latex/figs/LangChain_cropped-2.pdf]

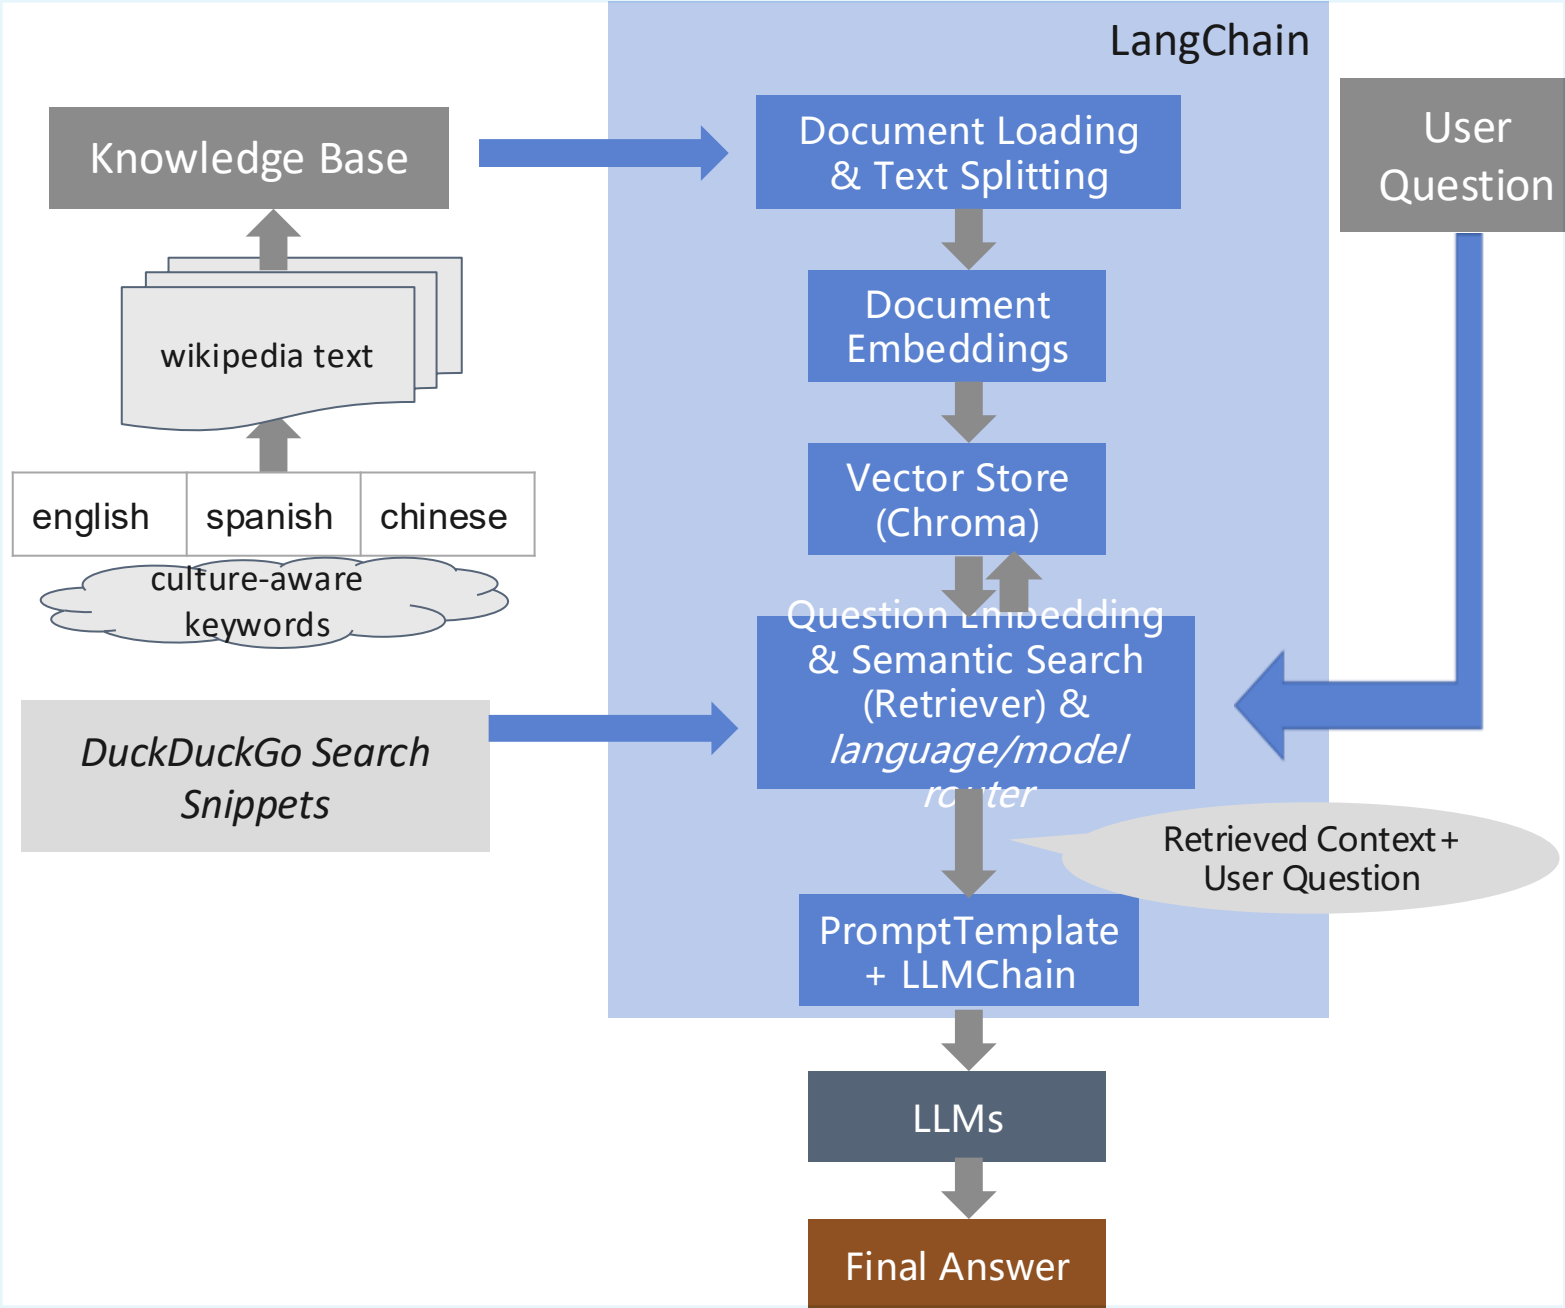

Supplement: SupplementaryMaterial [file LangChain_cropped.pdf › latex/figs/LangChain_cropped.pdf]

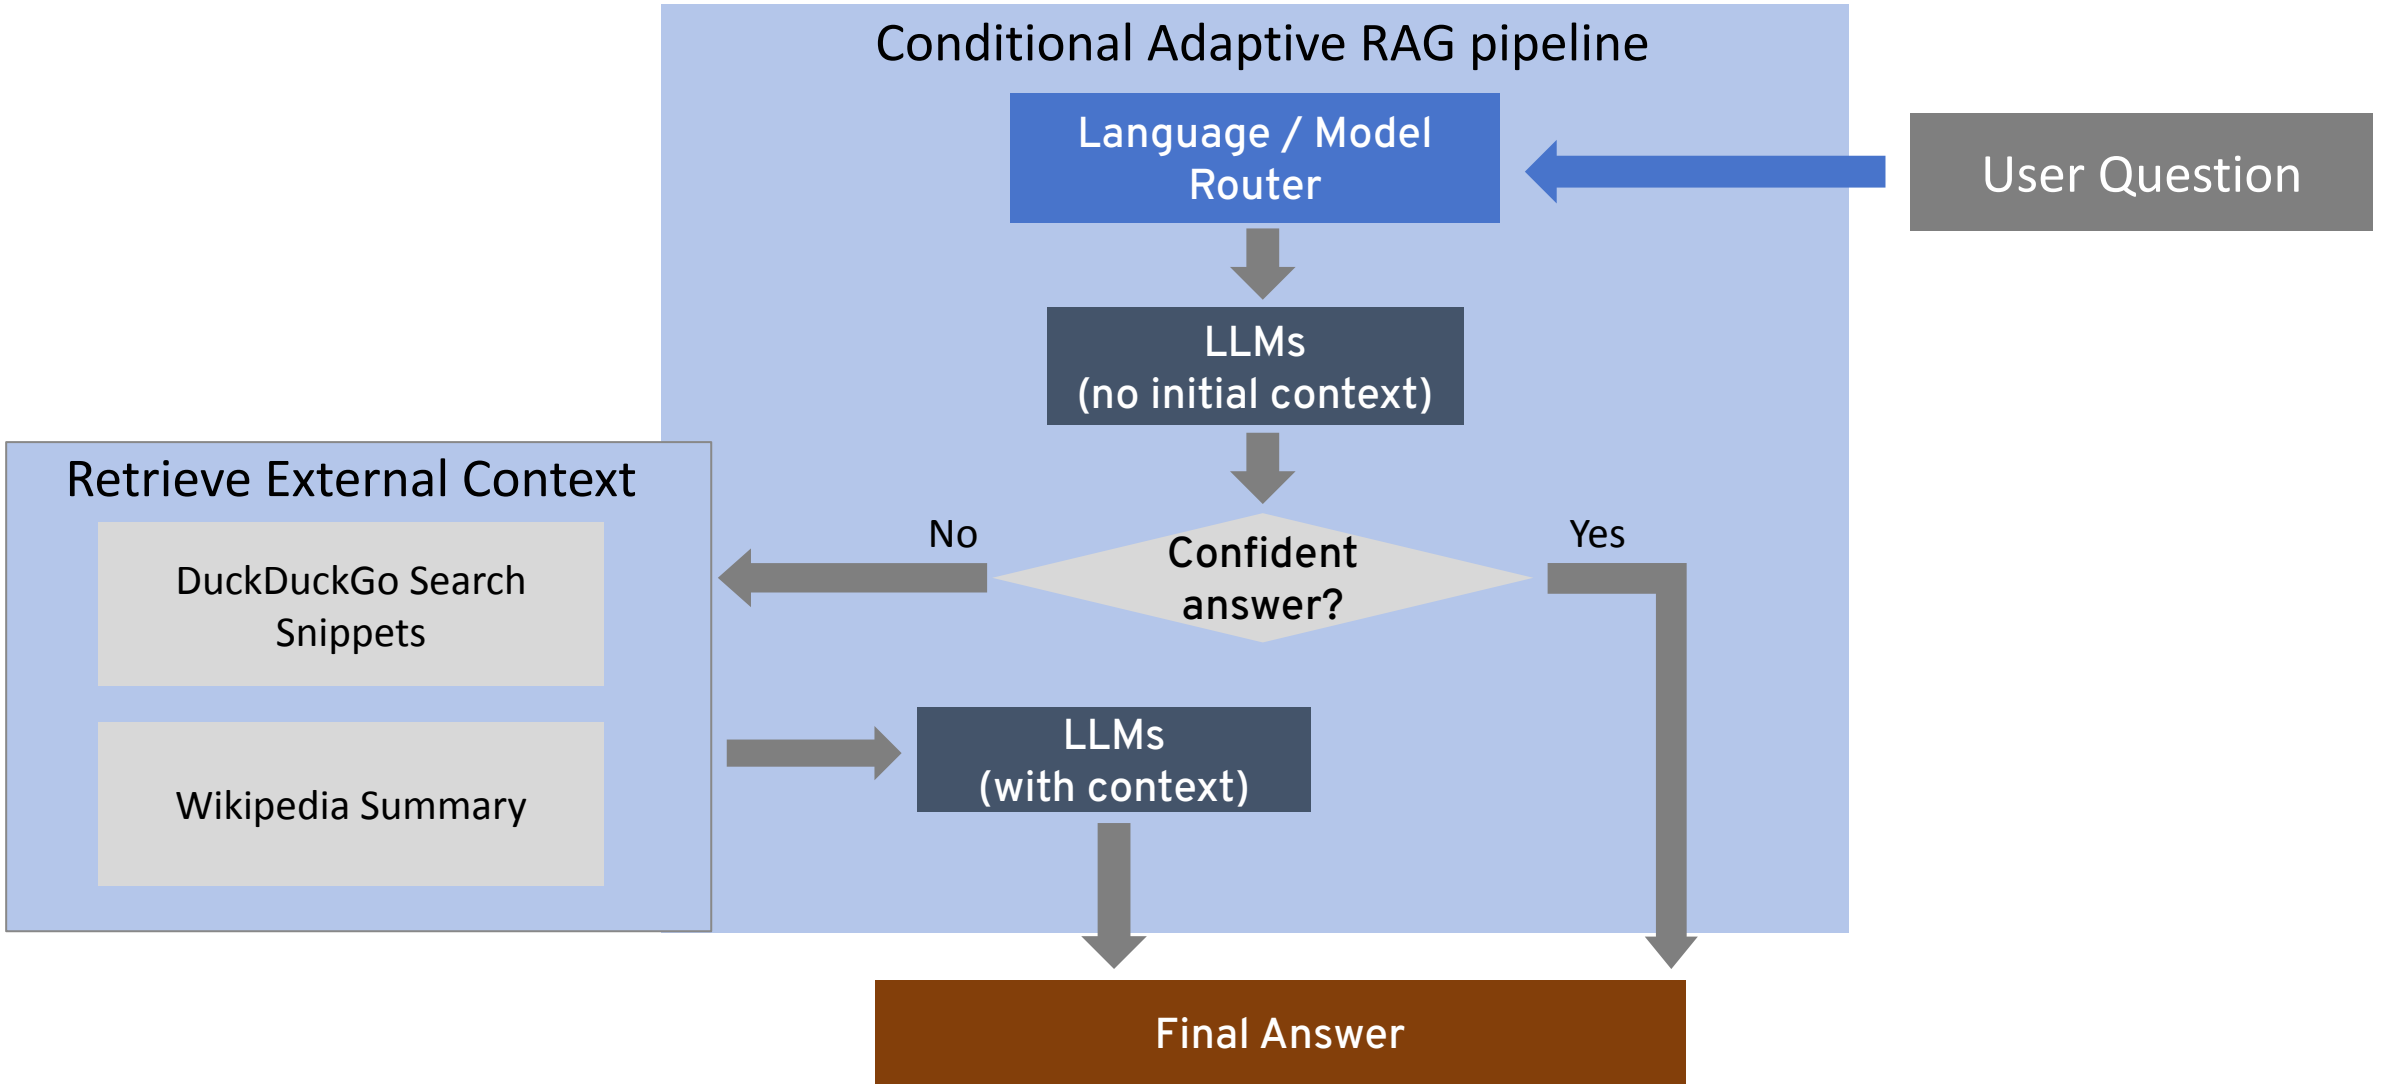

Supplement: SupplementaryMaterial [file LangChain_lili.pptx.pdf › latex/figs/LangChain_lili.pptx.pdf]
